# Supplementary material for: Characterization and Potential Antidiabetic Activity of Proanthocyanidins from the Barks of Acacia mangium and Larix gmelinii
Source: Hindawi journal article supplement (doi:10.1155/2019/4793047), 2019-03-03
Supplement: f1 [file 4793047.f1.docx]

**SUPPLEMENTARY MATERIAL**

**Characterization and Potential Antidiabetic Activity of Proanthocyanidins from the Barks of *Acacia mangium* and *Larix gmelinii***

X. Chen,1 J. Xiong,2 Q. He, 1 and F. Wang1, *

1 College of Chemical Engineering, Nanjing Forestry University, Jiangsu Key Lab for the Chemistry and Utilization of Agro-Forest Biomass, Nanjing 210037, China.
2 Plants for Human Health Institute, Food Bioprocessing and Nutrition Sciences Department, North Carolina State University, North Carolina Research Campus, Kannapolis, NC, 28081, USA

Correspondence should be addressed to F.Wang; hgwf@njfu.edu.cn

**Abstract**

Proanthocyanidins in ethanol extracts from the barks of *Acacia mangium* and *Larix gmelinii* were analyzed by gel permeation chromatography, MALDI-TOF/TOF MS, and HPLC/MS. The inhibitory effects of proanthocyanidins and acid-catalyzed hydrolysis of proanthocyanidins against carbolytic enzymes were also tested. A significant relationship between carbolytic enzymes inhibition and degree of polymerization was established showing that the degree of polymerization is a major contributor to the biological activity of the proanthocyanidins from both types of woody plant bark. The results indicate that proanthocyanidins from the barks of *A. mangium* and *L. gmelinii* have potential antidiabetic properties.

Figures S1: Mass spectram of oligomeric proanthocyanidins from LBE under different retention time.

Figures S2: Mass spectram of oligomeric proanthocyanidins from ABE under different retention time.

Figures S3: MALDI-TOF positive reflectron mode mass spectra of ABE.

Figures S4: MALDI-TOF positive reflectron mode mass spectra of LBE
